# Supplementary material for: A wide-range operating synaptic device based on organic ferroelectricity with low energy consumption
Source: Royal Society of Chemistry journal article supplement (doi:10.1039/c8ra04403a), 2018-01-01
Supplement: c8ra04403a1.pdf [file c8ra04403a1.pdf]

Supplementary Material for

# A wide-range operating synaptic device based on organic ferroelectricity with low energy consumption

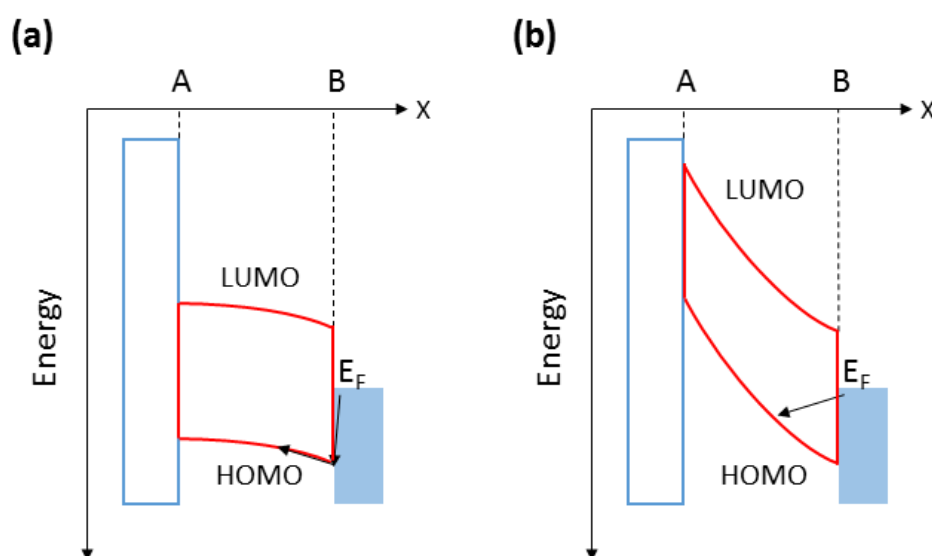

**Fig. S1** Band diagram at the ITO contact of an unpoled (a)/poled (b) diode along the cross section A-B in Fig. 1(b) of the paper. Poling of the ferroelectric material yields opposite charges at the ferroelectric-semiconductor interface, induces band bending in the semiconductor and leads to enhanced charge injection.
